# Supplementary material
Source: PubMed Central journal article supplement (PMC5033854)
Supplement: jciinsight-1-83116-s001.pdf [file jciinsight-1-83116-s001.pdf]

Supplemental Figure 1.

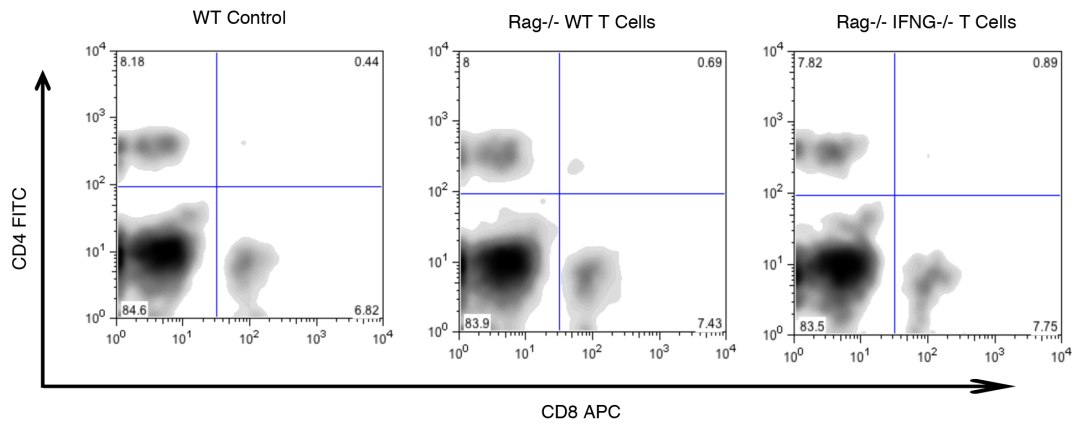

**Supplemental Figure 1. Reconstitution of RAG null mice with WT or IFN<sup>-/-</sup> T cells.** Flow cytometric analysis of T cell reconstitution of Rag null mice 14 days following T cell transfer. Experiments were performed at least 3 times with 10 mice per group.

Supplemental Figure 2.

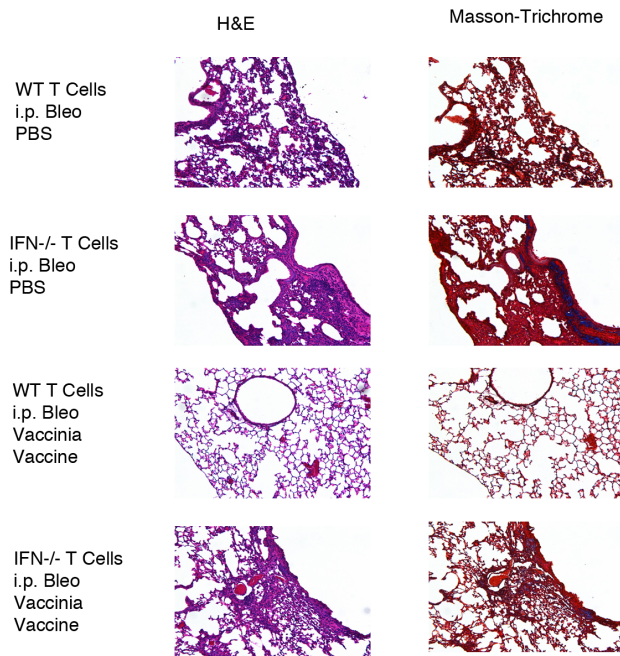

**Supplemental Figure 2. Reversal of pulmonary fibrosis by vaccinia immunotherapy requires Th1 CD4+ T cells.** Histology of lung sections on day 70 following transfer of either WT or IFN gamma null CD4+ and CD8+ T cells into *RAG*<sup>-/-</sup> recipients followed by i.p. bleomycin with or without vaccinia vaccine immunotherapy. H&E and Masson Trichrome staining viewed at 100x magnification. Experiments were performed at least 3 times with 10 mice per group.

Supplemental Figure 3.

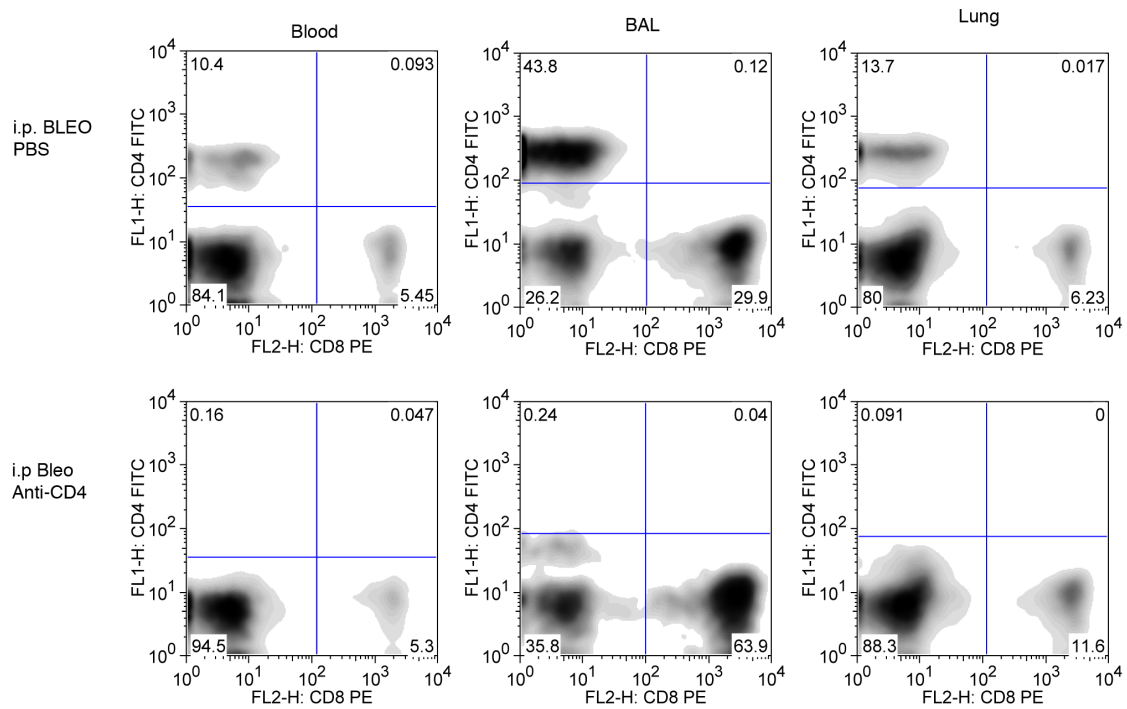

**Supplemental Figure 3. Effectiveness of T cell depletion by repeated anti-CD4 antibody injection.** Flow cytometric analysis of CD4 T cells in blood, bronchial lavage fluid (BAL) and Lung tissue following i.p. bleomycin treatment with or without anti-CD4 antibody injection. Experiments were performed three times with 5 mice per group.

Supplemental Figure 4.

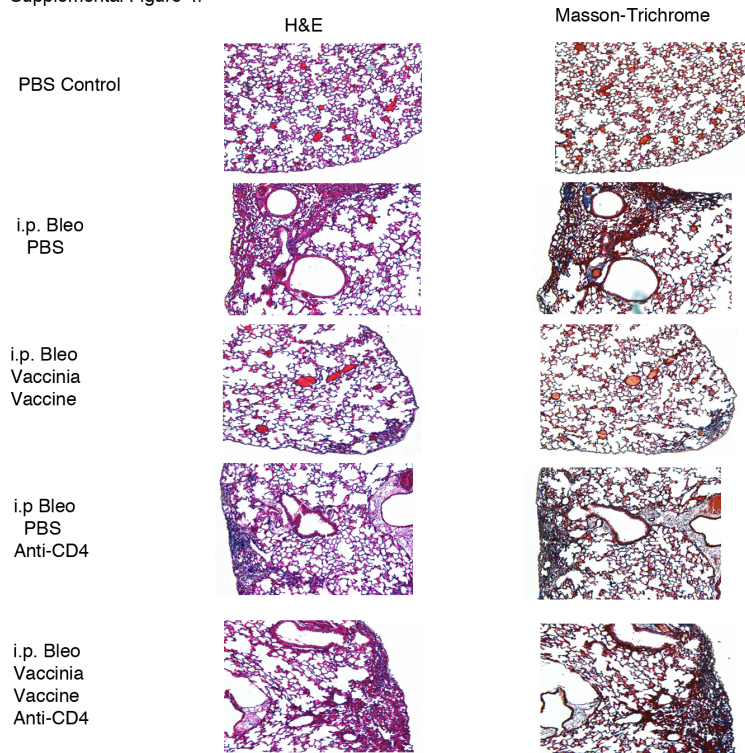

**Supplemental Figure 4. Lung resident memory CD4<sup>+</sup> T cells are required for the protective effect seen with vaccinia therapy.** Histology of lungs on Day 42 following intraperitoneal bleomycin with or without vaccinia vaccine treatment and T cell depletion. H&E and Masson Trichrome at 100x magnification. Experiments were performed three times with 5 mice per group.
